# Supplementary material for: The allosteric activation of cGAS underpins its dynamic signaling landscape
Source: eLife journal article supplement (doi:10.7554/elife.39984), 2018-10-08
Supplement: supp [file elife-39984-supp-v1.zip]

Archive with 13 entries (13 files):
- elife_poa_e39984_Figure_5_figure_supplement_1.ai
- elife_poa_e39984_Figure_3_figure_supplement_2.ai
- elife_poa_e39984_Figure_4_figure_supplement_3.ai
- elife_poa_e39984_Figure_2_figure_supplement_1.ai
- elife_poa_e39984_Figure_4_figure_supplement_1.ai
- elife_poa_e39984_Transparent_Reporting_File.pdf
- elife_poa_e39984_Figure_4_figure_supplement_2.ai
- elife_poa_e39984_Figure_5_figure_supplement_2.ai
- elife_poa_e39984_Figure_7_figure_supplement_1.ai
- elife_poa_e39984_Figure_3_figure_supplement_1.ai
- elife_poa_e39984_Figure_6_figure_supplement_1.ai
- elife_poa_e39984_Figure_6_figure_supplement_2.ai
- elife_poa_e39984_Figure_1_figure_supplement_1.ai
